# Supplementary material for: Modeling and analysis of ammonia oxidation and nitrous oxide formation on a dual-layer ammonia slip catalyst for diesel after-treatment
Source: Royal Society of Chemistry journal article supplement (doi:10.1039/d3re00075c), 2023-01-01
Supplement: d3re00075c1.pdf [file d3re00075c1.pdf]

# Supplementary Information

## **Modeling and analysis of ammonia oxidation and nitrous oxide formation on dual-layer ammonia slip catalyst for diesel after-treatment**

Dongwei Yao<sup>a,b,\*</sup>, Yuxi Li<sup>a</sup>, Feng Wu<sup>a</sup>, Weiyang Jin<sup>c</sup>, Ziyang Zhang<sup>a</sup>, Xiaohan Hu<sup>a</sup>, Jiadong Hu<sup>a</sup>

*(a College of Energy Engineering, Zhejiang University, Hangzhou 310027, China*

*b Key Laboratory of Smart Thermal Management Science & Technology for Vehicles of Zhejiang Province, Taizhou 317200, China*

*c Wuxi Weifu Environmental Catalysts Co., Ltd, Wuxi 214018, China)*

*\* Corresponding author at: College of Energy Engineering, Zhejiang University, 38 Zheda Road, West Lake District, Hangzhou, Zhejiang Province 310027, China*

*E-mail: dwyao@zju.edu.cn (Dongwei Yao)*

The developed low-dimensional kinetic model was compared with the full 1+1D kinetic model from reference to confirm the validity of the approximation of the internal Sherwood number.<sup>1</sup> The optimized kinetic parameters from the developed low-dimensional kinetic model were used in the full 1+1D kinetic model without further optimization. As shown in Fig. S1-S3, the simulated results indicated that the developed low-dimensional kinetic model has good prediction in conversion and product selectivity as well as the full 1+1D kinetic model. The biggest prediction errors of the developed low-dimensional kinetic model for Cu/SSZ-13 catalyst under Standard SCR conditions, Pt/Al<sub>2</sub>O<sub>3</sub> and dual-layer ASC catalysts under ammonia oxidation conditions were 6.2%, 6.4% and 4.7%, respectively. While the biggest prediction errors of the full 1+1D kinetic model were 6.0%, 8.3% and 5.0%, respectively. The quantitative comparison results of model prediction error confirmed the validity of approximation.

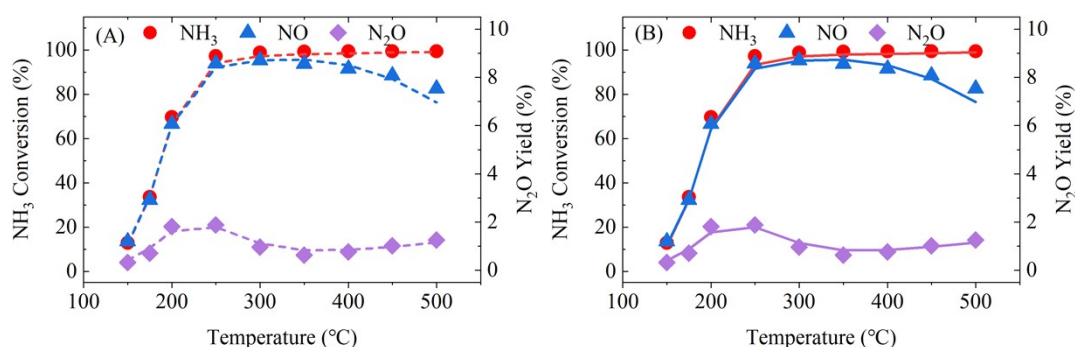

Fig. S1. (A) The developed low-dimensional kinetic model and (B) full 1+1D kinetic model simulated NH<sub>3</sub>, NO conversions and N<sub>2</sub>O yields under Standard SCR conditions over Cu/SSZ-13 catalyst at GHSV 60,000/hour. Feed: 300 ppm NH<sub>3</sub>, 300 ppm NO, 10% O<sub>2</sub>, 5% H<sub>2</sub>O, balance N<sub>2</sub>. (symbols: experiments; dash lines: developed low-dimensional kinetic model simulation; lines: full 1+1D kinetic model simulation)

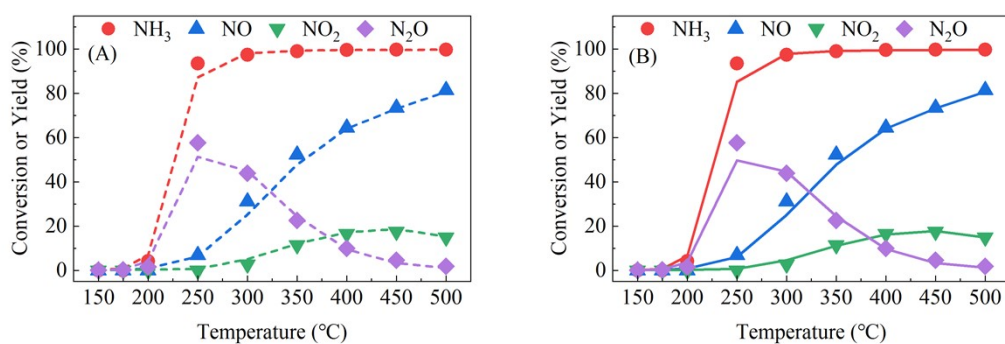

Fig. S2. (A) The developed low-dimensional kinetic model and (B) full 1+1D kinetic model simulated NH<sub>3</sub> conversions and product yields under NH<sub>3</sub> oxidation conditions over Pt/Al<sub>2</sub>O<sub>3</sub> catalyst at GHSV 90,000/hour. Feed: 300 ppm NH<sub>3</sub>, 10% O<sub>2</sub>, 5% H<sub>2</sub>O, balance N<sub>2</sub>. (symbols: experiments; dash lines: developed low-dimensional kinetic model simulation; lines: full 1+1D kinetic model simulation)

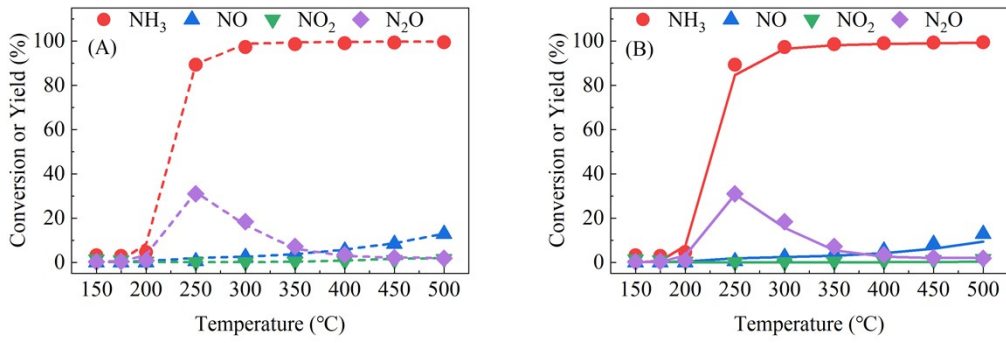

Fig. S3. (A) The developed low-dimensional kinetic model and (B) full 1+1D kinetic model simulated NH<sub>3</sub> conversions and product yields under NH<sub>3</sub> oxidation conditions over dual-layer ASC catalyst at GHSV 90,000/hour. Feed: 300 ppm NH<sub>3</sub>, 10%O<sub>2</sub>, 5%H<sub>2</sub>O, balance N<sub>2</sub>. (symbols: experiments; dash lines: developed low-dimensional kinetic model simulation; lines: full 1+1D kinetic model simulation)

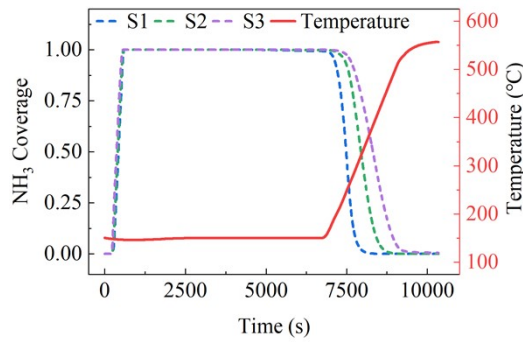

Fig. S4. Simulated NH<sub>3</sub> coverages during NH<sub>3</sub>-TPD experiment over Cu/SSZ-13 catalyst at GHSV 60,000/hour. Feed: 300 ppm NH<sub>3</sub>, 5% H<sub>2</sub>O, balance N<sub>2</sub> during adsorption; 5% H<sub>2</sub>O, balance N<sub>2</sub> during purge process and temperature programmed desorption process.

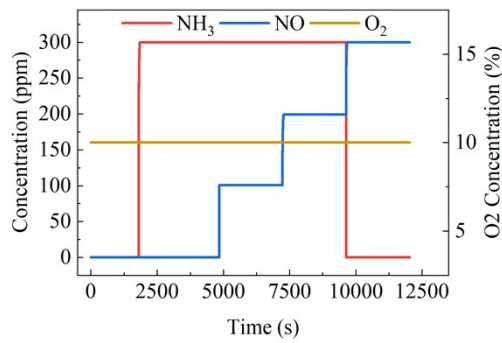

Fig. S5 Isothermal transient experiment inlet gas mole fraction concentrations at 250°C with N<sub>2</sub> as balance gas.

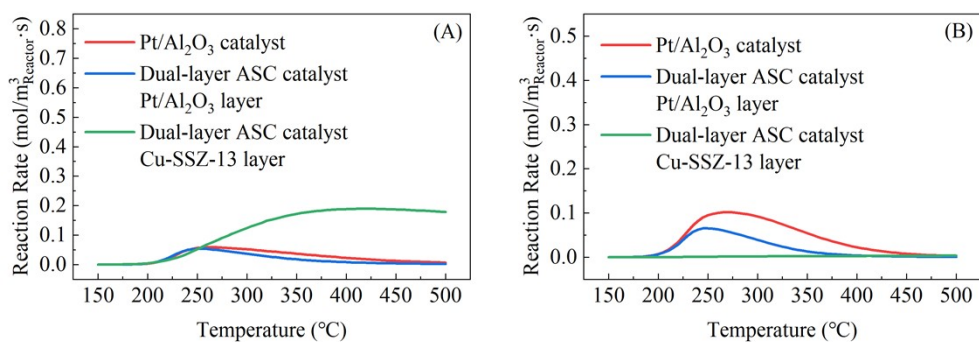

Fig. S6 Model predicted (A)  $N_2$  and (B)  $N_2O$  formation rates under  $NH_3$  oxidation conditions at GHSV 90,000/hour. Feed: 300 ppm  $NH_3$ , 10%  $O_2$ , 5%  $H_2O$ , balance  $N_2$ .

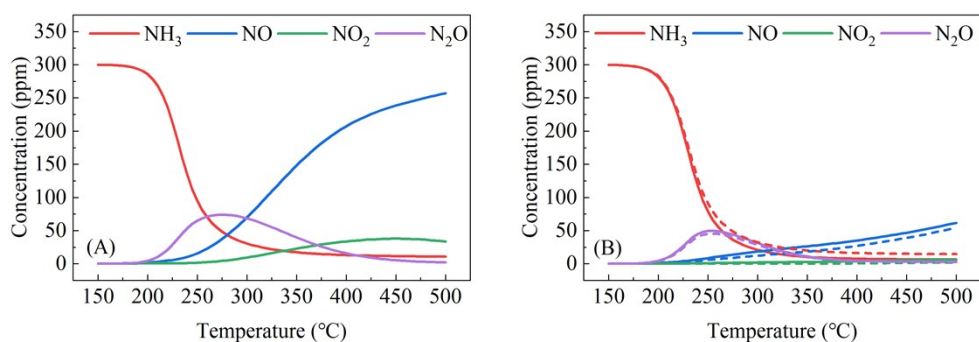

Fig. S7 Model predicted species concentrations within washcoat over (A)  $Pt/Al_2O_3$  catalyst and (B) dual-layer ASC catalyst under  $NH_3$  oxidation conditions at GHSV 90,000/hour. Feed: 300 ppm  $NH_3$ , 10%  $O_2$ , 5%  $H_2O$ , balance  $N_2$ . (lines:  $Pt/Al_2O_3$  layer; dash lines:  $Cu/SSZ-13$  layer)

## Reference

- 1 P. S. Dhillon, M. P. Harold, D. Wang, A. Kumar and S. Y. Joshi, *React. Chem. Eng.*, 2019, **4**, 1103–1115.
